# Supplementary material for: Presynaptic developmental plasticity allows robust sparse wiring of the Drosophila mushroom body
Source: eLife journal article supplement (doi:10.7554/elife.52278), 2020-01-08
Supplement: supp [file elife-52278-supp-v1.zip]

Archive with 16 entries (16 files):
- elife_poa_e52278_Figure_7_video_2.avi
- elife_poa_e52278_Figure_2_figure_supplement_3.ai
- elife_poa_e52278_Figure_3_video_1.avi
- elife_poa_e52278_Figure_1_video_1.avi
- elife_poa_e52278_Transparent_Reporting_File.pdf
- elife_poa_e52278_Figure_3_figure_supplement_1.ai
- elife_poa_e52278_Figure_5_figure_supplement_1.ai
- elife_poa_e52278_Figure_1_figure_supplement_1.ai
- elife_poa_e52278_Figure_7_source_data_1.xlsx
- elife_poa_e52278_Figure_2_figure_supplement_1.ai
- elife_poa_e52278_Figure_7_figure_supplement_1.ai
- elife_poa_e52278_Figure_4_figure_supplement_1.ai
- elife_poa_e52278_Figure_7_video_1.avi
- elife_poa_e52278_Figure_5_figure_supplement_2.ai
- elife_poa_e52278_Figure_1_figure_supplement_2.ai
- elife_poa_e52278_Figure_2_figure_supplement_2.ai
