# Supplementary material for: Presynaptic developmental plasticity allows robust sparse wiring of the Drosophila mushroom body
Source: eLife journal article supplement (doi:10.7554/elife.52278), 2020-01-08
Supplement: supp [file elife-52278-supp-v1.zip › elife_poa_e52278_Figure_7_source_data_1.xlsx]

## Sheet: Notes
This spreadsheet contains peak df/f values for each analyzed cell from the 7 reduced-KC and 7 sham-treated calyces in Figure 7.
The response to the second presentation of each odor is shown.
Baseline is the average of that cell over the three second precedng odor onset.
Peak is taken from the 4.5 seconds after the command is sent to open the odor valve. Valves were open for 2s and odor was present in the chamber until .5s after valve closing, as measured by PID.
Cells are only included if they remained stable in the ROI during the odor presentation.
In some samples, as indicated, motion-induced shifts in the cloud of somata caused us to analyze distinct cells for certain odors.
The order in which the odors are shown here is standardized, not necessarily the original order of presentation.

## Sheet: Sham1 (female)
	MO	EA	IBA	BZH	MCH
1	0.0313473	0.0100345	0.00174154	0.419183	0.0496998
2	0.0416834	0.0186629	0.0923653	0.0540645	0.0121512
3	0.28235	0.320995	0.371293	0.295025	0.140081
4	0.128349	0.245577	0.339531	0.21331	0.07439
5	0.039314	0.333478	0.345992	0.0365072	0.0411051
6	0.0767742	0.273793	0.112259	0.177202	0.374614
7	0.120981	0.521005	0.485171	0.23075	0.0460588
8	0.170805	0.830901	0.271781	0.377008	0.150413
9	0.190908	0.21615	0.293486	0.124143	0.230328
10	0.0928225	0.264074	0.376685	0.240145	0.443956
11	0.0845517	0.150866	0.157739	0.245048	0.268484
12	0.0797985	0.156621	0.230791	0.217555	0.0459227
13	0.0722681	0.0890109	-0.0065827	0.0861796	0.140134
14	0.0657274	0.068802	0.0563283	0.0754542	0.103751
15	0.0915629	0.0940835	0.149978	0.334371	0.712947
16	0.084476	0.16642	0.467282	0.120078	0.0813554
17	0.0778508	0.0897728	0.014683	0.132416	0.161346
18	0.110702	0.217713	0.163231	0.0731495	0.0351167
19	0.0630858	0.111037	0.12805	0.0890625	0.0855484
20	0.0961126	0.135137	0.0338194	0.113537	0.043468
21	0.0716177	0.694083	0.631347	0.107099	0.0558448
22	0.0783124	0.635407	0.57304	0.0904471	0.142271
23	0.0995393	0.133369	0.336632	0.101448	0.078922
24	0.105095	0.0023656	-0.0041669	0.11487	0.0358706
25	0.124284	0.0288911	0.256899	0.0427851	-0.0003839
26	0.187886	1.06291	0.199078	0.0990422	0.158393
27	0.130156	0.229831	0.238564	0.110349	0.147614
28	0.0816849	0.128765	0.0734124	0.141071	0.170265
29	0.057569	0.0660171	0.0219383	0.467868	0.632132
30	0.189393	0.155164	0.0928217	0.0619041	0.0602494
31	0.0638349	0.107993	0.316877	0.119145	0.286536
32	0.0578517	0.368333	0.442154	0.108186	0.0775802
33	0.135986	0.817197	1.19454	0.158364	0.175477
34	0.0840167	0.137526	0.177915	0.035911	0.0775869
35	0.135352	0.483533	0.138583	0.0550441	0.256973
36	0.0807599	-0.0008576	-0.0006956	0.0510848	-0.0011759
37	0.141823	0.0393605	-0.0538436	0.0282117	-0.0713038
38	0.0249226	0.0764079	0.122387	0.0314927	-0.0083886
39	0.0499998	0.0620052	0.017605	0.0647673	0.00571825
40	0.0545149	0.0203385	0.0361099	0.0705235	0.121508
41	0.0892033	0.489398	0.232034	0.0835507	0.150236
42	0.126661	0.155591	0.311578	0.145657	0.187538
43	0.209449	0.42282	0.756267	0.0332916	-0.004399
44	0.15454	0.0692616	0.0471467	0.392945	0.146865
45	0.0722117	0.135666	0.395296	0.28198	0.124976
46	0.0336002	0.119956	0.126265	0.0662297	0.124113
47	0.104655	0.0405806	0.0473206	0.0725257	0.0769787
48	0.0770603	0.369406	0.146775	0.0928316	0.16684
49	0.0546484	0.125896	0.0930766	0.14179	0.196791
50	0.115568	0.06064	0.0382997	0.0433224	0.0409485
51	0.213331	0.257294	0.35249	0.273721	0.790065
52	0.0533561	0.0691619	0.109235	0.264073	0.188802
53	0.112239	0.100549	0.208417	0.0652477	0.135031
54	0.151544	0.245444	0.261047	0.134913	0.124899
55	0.207813	0.396221	0.00487585	0.284537	0.372414
56	0.31357	0.32692	0.00635383	0.0733166	0.0510128
57	0.0617968	0.158857	0.430696	0.0619102	0.0324827
58	0.0505607	0.162537	0.518099	0.285384	0.371047
59	0.0859271	0.0781728	0.0474853	0.0393415	0.0595129
60	0.0625861	0.247376	0.512594	0.0260864	0.132771
61	0.181114	0.164714	0.0556722	0.158282	0.0306891
62	0.138621	0.212625	0.347875	0.881731	0.185651
63	0.106169	0.344723	0.997322	0.139096	0.170758
64	0.17512	0.0980365	0.349406	0.128711	0.0621814
65	0.12898	0.484032	0.249544	0.107081	0.103594
66	-0.0149839	0.117554	0.243883	0.590043	0.232348
67	0.0302808	0.148901	0.590403	0.0825802	0.145017
68	0.292556	0.11755	0.164451	0.143399	-0.0022172
69	0.286024	0.123534	0.381397	0.0760717	0.124088
70	0.220509	0.885125	2.58385	0.0494286	0.25763

## Sheet: Sham2 (female)
	MO	EA	IBA	BZH	MCH
1	0.0468269	0.0398479	0.0682289	0.0458785	0.0556441
2	0.161825	0.152595	0.489717	0.159119	0.303494
3	0.0622975	0.114903	0.0438817	0.0687448	0.136872
4	0.111871	0.182707	0.16189	0.0764515	0.0975883
5	0.169508	0.0933663	0.214339	0.237488	0.168949
6	0.0636699	0.0350412	0.0304326	0.0697695	0.167065
7	0.0392659	0.11636	0.098012	0.0728249	0.0730496
8	-0.0009771	0.0650961	0.0424988	0.0600074	0.202501
9	-0.0396754	0.0979084	0.0660463	0.483475	0.0121669
10	0.118853	0.215624	0.210412	0.16761	0.265416
11	0.020199	-0.0042275	0.0228601	-0.0215646	0.0649257
12	-0.0291904	0.00670814	0.0235394	-0.0005836	0.0710864
13	0.0100161	0.0999806	0.0381423	-0.0128061	-0.002608
14	0.0928808	0.192293	0.190722	0.131301	0.0671994
15	0.157459	0.105571	0.103059	0.0164626	0.170312
16	0.143348	0.0769572	0.205822	0.114962	0.0993122
17	0.0157233	0.0569538	0.0286549	0.0540177	0.0780887
18	0.145165	0.102319	0.153964	0.120669	0.0648143

## Sheet: Sham3 (female)
	EA	IBA	BZH	MCH (different ROIs)
1	0.192021	1.21941	0.0555574	0.131104
2	0.181039	1.03968	0.116932	0.17627
3	0.856585	2.01392	0.0539086	0.128389
4	0.0739	0.681736	0.531089	0.28023
5	0.438684	0.385484	0.223052	0.481328
6	0.388194	0.5462	0.206427	0.0704513
7	-0.0847697	0.47402	0.300421	0.175327
8	1.2301	1.12421	0.656341	0.325875
9	1.10167	1.1986	0.052115	0.384324
10	0.0874527	0.354622	0.263565	0.101562
11	0.671381	1.23981	0.455795	0.0148891
12	0.957806	1.01036	0.504941	0.186831
13	1.68183	0.419418	0.135964	0.120328
14	0.328923	0.250337	0.250681	0.176863
15	0.405157	0.0802645	0.716457	0.0860448
16	0.0806813	0.0391041	0.120359	0.113035
17	0.328408	0.327846	0.64795	0.0896111
18	0.0285454	0.188782	0.34145	0.0991045
19	0.12085	0.150844	0.136554	0.325455
20	0.122982	0.508294	0.406309	-0.0207536
21	0.198693	0.244547	0.367888	0.303439
22	0.892297	0.616019	0.0513291	0.414942
23	0.221304	0.139206	0.242068	0.37321
24	0.128033	0.263065	0.0702683	0.557435
25	0.197975	0.161433	0.229372	0.165457
26	0.112734	0.31719	0.412622	0.44595
27	0.177026	0.152841	0.0977939	0.144278
28	0.173615	0.220449	0.193082	-0.0296027
29	0.963619	0.0993233	0.560101	0.175391
30	0.30936	0.706277	0.439054	0.465357
31	0.596772	0.390261	0.988524	0.071394
32	0.227354	0.358328	0.334334	0.683307
33	0.902851	0.690569	0.352154
34	0.182275	0.222571	0.383921
35	0.832993	0.779914	0.861147

## Sheet: Sham4 (male)
	MO	EA	IBA	BZH	MCH
1	0.0134893	0.0583217	0.131362	0.0510778	0.0507474
2	0.156328	0.909979	0.624288	0.0829118	0.0810042
3	0.00441625	0.293256	0.126247	0.143543	0.0883819
4	0.022949	0.07034	0.0738338	0.145064	0.0645609
5	0.208274	0.395634	0.280729	0.0429584	0.160206
6	0.135041	0.752672	0.956944	0.306166	0.109692
7	0.0990108	0.831598	0.237256	0.169989	0.0371364
8	0.110376	0.807211	0.685693	0.240273	0.0904673
9	0.0595999	0.623678	0.394151	0.384388	0.107343
10	0.0219496	0.172312	0.171628	0.16763	0.0349886
11	0.07562	0.0739782	0.0798653	0.234698	0.0379353
12	0.0276925	0.204273	0.154169	0.0772599	0.031502
13	0.0522543	0.0485423	0.14822	0.124667	0.0312953
14	0.0316396	0.0736808	0.122102	0.0663844	0.0684889
15	0.258924	0.428582	0.154601	0.263094	0.166874
16	0.415765	0.385063	0.337796	0.614819	0.298917
17	0.195714	0.196896	0.230917	0.313726	0.115247
18	0.125496	0.105396	0.118239	0.201696	0.113074
19	0.0590296	0.066188	0.14718	0.0559118	0.0445488
20	0.0191603	0.390007	0.350038	0.147636	0.0634009
21	0.165198	0.119226	0.241629	0.0822817	0.103707
22	0.0582914	0.121687	0.0668577	0.0670871	0.0817414
23	0.00322756	0.705327	0.103112	0.110899	0.059247
24	0.108304	0.603189	0.799905	0.292288	0.144566
25	0.12474	0.233718	0.129793	0.384357	0.100233
26	0.119543	0.249302	0.45866	0.2524	0.0937181
27	0.0662039	0.0518372	0.0769075	0.0450243	0.0572996
28	0.107963	0.179161	0.13487	0.110271	0.114285
29	0.0673437	0.173957	0.177285	0.0925664	0.0754014
30	0.0592507	0.100796	0.0977619	0.0518115	0.130229
31	0.0244415	0.210276	0.157995	0.0830541	0.0444266
32	0.053695	0.211341	0.163346	0.0585355	0.070821
33	0.0823476	0.0852156	0.138814	0.128965	0.0692532
34	0.0253781	0.49037	0.315617	0.295557	0.158824
35	0.0276612	0.0356115	0.13747	0.112673	0.046421
36	0.0899093	0.0997718	0.100752	0.120336	0.056652
37	0.0220701	0.0907216	0.0837584	0.101605	0.0726895

## Sheet: Sham5 (male)
	MO	EA	IBA	BZH	MCH
1	0.0561884	0.100965	0.0726614	0.00520426	0.0914707
2	0.0349688	0.0132443	0.0293251	0.0105205	0.0137338
3	0.0306994	0.0910651	0.0440863	0.0647782	0.0022499
4	0.0597785	0.0548113	0.111384	0.0266431	0.0524483
5	0.10321	0.044397	0.0686059	0.0302769	0.0397897
6	0.185257	0.163919	-0.0411708	0.170025	0.590927
7	0.134921	0.0997291	-0.114336	0.0074675	0.391469
8	0.0789755	0.277752	0.00542098	0.0559235	0.0855519
9	0.0102952	0.151272	0.0385816	-0.00718501	0.162985
10	0.0993955	0.352527	0.230241	0.0625908	0.0792868
11	0.0666465	0.1725	0.143129	0.0437358	0.0703107
12	0.121657	0.210587	0.355031	0.0830026	0.0648397
13	0.224241	0.325381	0.433509	0.0773247	0.100087
14	0.199578	0.572942	0.826571	0.0286833	0.177876
15	0.173715	0.154426	0.128041	0.141945	0.0236576
16	0.198502	0.435226	0.242192	0.172675	0.182092
17	0.202578	0.258788	0.512588	0.10212	0.207911
18	0.0299309	0.5336	0.0696119	0.270937	0.0876337
19	0.125181	0.575121	2.32674	0.13383	0.0117919
20	0.253876	0.192088	0.134036	0.246194	0.0314963
21	0.128032	0.366817	0.71389	0.234321	0.0586096
22	0.0471228	0.0748818	0.600632	0.0455283	0.0391434
23	0.104751	0.227669	0.713216	0.0853752	0.0768769
24	0.0579508	0.20471	0.831359	0.0734627	-0.00640078
25	0.286887	0.629583	1.99955	0.267653	0.0776158
26	0.107048	0.331984	-0.0562008	0.0235296	0.228077
27	0.0790946	0.285641	0.273882	0.125392	0.14877
28	0.0586805	0.151362	0.0967461	0.0819165	0.0636828
29	0.0363143	0.0978121	0.0797332	0.0964435	0.0259958
30	0.0765179	0.0353489	0.0656615	0.01172	-0.118543
31	0.0422448	0.0224036	0.0900032	0.0612405	-0.0465654
32	0.312068	0.487794	0.170336	0.144984	0.115
33	0.0332583	0.0735838	0.0880693	0.135514	0.0109675
34	0.0433346	0.113582	0.104767	0.118543	0.0699893
35	0.176742	0.0596699	0.200669	0.0957949	0.0443336
36	0.0575987	0.0534916	0.0818713	0.102673	0.0545355
37	0.0422539	0.0887101	0.0604422	0.0962012	0.0075611
38	0.0371456	0.123043	0.250189	0.0801037	-0.000619688
39	0.0898552	0.113137	0.0856115	0.0329483	0.129476
40	0.126069	0.161978	0.633537	0.0997924	0.125034
41	0.0963819	0.145247	0.136632	0.0439771	0.0505828
42	0.0933737	0.00762195	0.206124	0.0926184	-0.00185621
43	0.0247403	0.0936235	0.800887	0.107811	-0.0330431
44	0.157524	0.132377	0.486252	0.128549	0.00727489
45	0.162183	0.545563	0.546572	0.185777	0.0638653
46	0.0431827	0.101207	0.0676246	0.0338517	0.156262

## Sheet: Sham6 (female)
	MO	EA	IBA	BZH	MCH
1	0.0357169	0.184583	0.098884	0.252123	0.0699241
2	0.154834	0.0769151	0.0949585	0.141135	0.445224
3	0.266567	0.336446	0.320654	0.311539	0.0782693
4	0.319534	0.241212	0.354431	0.441402	0.263351
5	0.163724	0.484841	0.255001	0.473779	0.107151
6	0.147634	0.127819	0.302743	0.220712	0.330919
7	0.140753	0.371341	0.486468	0.202633	0.124232
8	0.163542	0.46992	0.331185	0.114064	0.104627
9	0.739514	0.558148	0.238857	0.0577647	0.441026
10	0.136209	1.37566	1.20039	0.37631	0.106901
11	1.14881	1.02495	0.285285	0.557244	0.158303
12	0.956754	0.516326	0.218559	0.821419	0.582753
13	0.420873	0.0683155	0.0976117	0.257388	1.08679
14	0.680166	0.196557	0.518957	0.672535	1.91351
15	0.074161	0.299896	0.240482	0.117376	0.133264
16	0.278002	0.0848127	0.499813	0.271862	0.0917388
17	0.419821	0.267317	1.18931	0.61719	0.433393
18	0.401086	0.562041	0.419758	2.57541	0.439319
19	0.0553293	0.115331	0.164656	0.119233	0.216611
20	0.253302	0.488831	0.338045	0.55011	0.201739

## Sheet: Sham7 (male)
	MO	EA	IBA	BZH	MCH
1	0.401958	0.0992813	0.0584591	0.139201	0.189918
2	0.629877	0.190989	0.0702617	0.461658	0.31498
3	0.198243	0.180187	0.275602	0.232429	0.11313
4	0.872899	0.287355	0.554657	0.411492	0.637734
5	0.245997	0.157074	0.160482	0.15786	0.32688
6	0.0585265	0.103841	0.168733	0.0255804	0.137042
7	0.255586	0.322327	0.51677	0.195975	0.438883
8	0.206868	0.632656	0.193996	0.300677	0.488011
9	0.336889	0.211093	0.278762	0.136346	0.328985
10	0.326408	0.552999	0.440476	0.023148	0.543336
11	0.344829	0.307317	0.605697	0.195356	0.227125
12	0.0331954	0.316326	0.246687	0.205059	0.082062
13	0.102224	0.105285	1.07814	0.148145	0.0569151
14	0.237197	0.252369	0.0493995	0.134985	0.418828
15	0.957498	0.375825	0.259315	0.327988	0.58105
16	0.637262	0.118151	0.293215	0.180302	0.447616

## Sheet: reduced-KC1 (female)
	MO (different ROIs)	EA	IBA	BZH	MCH (different ROIs)
1	0.346138	0.491559	0.308017	0.368339	0.0690544
2	0.33816	0.552976	0.578963	0.36679	0.185162
3	0.52332	0.116913	0.0768898	0.292289	0.140848
4	0.181533	0.215024	0.240723	0.26666	0.238805
5	0.117084	0.106164	0.0598157	0.201529	0.138986
6	0.224298	0.265468	0.19678	0.057173	0.0852642
7	0.0704873	0.101235	0.0817368	0.192934	0.0780529
8	0.366297	0.0791983	0.479113	0.268864	0.0463557
9	0.221378	0.05156	0.0550098	0.280775	0.228872
10	0.157056	0.430615	0.28029	0.187358	0.479297
11	0.144023	0.210968	0.128983	0.0729655	0.137653
12	0.0409197	0.334968	0.328475	0.261576	0.157923
13	0.0495192	0.711564	0.250819	0.324665	0.166854
14	0.150858	0.262026	0.449432	0.287635	0.12011
15	0.409898	0.436396	0.483889	0.161093	0.44633
16	0.098723	0.596925	0.186551	0.339404	0.52397
17	0.149816	0.262351	0.0942903	0.132293	0.227672
18	0.0948725	0.277938	0.209685	0.431345	0.303636
19	0.433644	0.538924	0.247181	0.485549	0.0928758
20	0.654893	0.0401706	0.114747	0.119358	0.0688367
21	0.508893	0.253756	0.0864607	0.37188	0.0764319
22	0.301842	0.105654	0.150083	0.0856294	0.520105
23	0.0572247	0.263366	0.135696	0.139863	0.784673
24	0.387341	0.930185	0.418441	0.446423	1.00041
25	0.495967	0.215286	0.25274	0.333568	0.228511
26	0.0783029	0.00201818	0.245769	0.212356	0.433775
27	0.118507	0.223845	0.209983	0.240348	0.31653
28	0.0668004	0.240968	0.771306	0.0848425	0.405322
29	0.0496784	0.106212	0.248832	0.403114	0.253743
30	0.311748	0.0224382	0.0714321	0.0603115	0.303529
31		0.249281	0.222709	0.709656	0.366183
32		0.268659	0.105167	0.869156
33		0.369968	0.45144	0.836527
34		0.47982	0.172637	0.242937
35		0.355809	0.327455	0.396896
36		0.371039	0.238241	0.30491
37		0.72326	0.584317	1.88617
38		0.177801	0.206729	0.0384964
39		0.2632	0.157951	0.175303
40		0.60648	0.256318	0.507269
41		0.178305	0.689938	0.146881
42		0.244924	0.100407	0.147104
43		0.134684	0.0947753	0.329476
44		0.529072	0.225679	0.319424
45		0.109815	0.132645	0.14249
46		0.221583	0.288984	0.205219
47		0.624891	0.291593	0.166915

## Sheet: reduced-KC2 (male)
	MO	EA	IBA	BZH	MCH
1	0.126218	0.0134244	0.0218634	0.0204332	0.0584477
2	0.185882	-0.0050905	0.0124482	0.0418697	0.100465
3	0.150201	0.0403184	0.266153	0.0234927	0.108387
4	0.213857	0.0209503	0.151762	0.0546421	0.27546
5	0.1254	0.0135329	0.469749	0.0304365	0.169678
6	0.288099	0.0267532	0.349202	0.034005	0.340258
7	0.0673626	0.0570069	0.208131	0.0546732	0.0428683
8	0.196769	0.0478772	0.440351	-0.002893	0.155195
9	0.302344	0.0928033	0.505892	0.0122384	0.460398
10	0.182095	0.0212382	0.0453959	0.0254869	0.093096
11	0.122052	0.0415225	0.0573553	0.0288254	0.0411253
12	0.263127	0.0529581	0.167798	0.041991	0.241978
13	0.155416	0.0569833	0.225194	0.0672901	0.161143
14	0.136131	0.0910539	0.221887	0.0788933	0.125567
15	0.0714218	0.0261803	0.500683	0.0505382	0.0745211
16	0.174897	0.0414058	0.0874806	0.0269407	0.299081
17	0.165152	0.103586	0.731682	0.058878	0.22998
18	0.051844	0.00235152	0.438219	0.0294936	0.0347817
19	0.155516	0.00926926	0.0562629	0.00890829	0.119528
20	0.0878842	0.0392225	0.149955	0.0357999	0.0570783
21	0.482712	0.0819175	0.286309	0.0694029	0.286043
22	0.216719	0.0923745	0.455484	0.0366732	0.171066
23	0.161496	0.0392379	0.216286	0.0525508	0.21659

[truncated: 5 more sheets: reduced-KC3 (male), reduced-KC4 (male), reduced-KC5 (female), reduced-KC6 (female), reduced-KC7 (male)]
